# Supplementary material for: Development and application of a shrimp shell waste/FeCl2-FeCl3 composite as an efficient bioadsorbent for dye removal from textile effluents
Source: Royal Society of Chemistry journal article supplement (doi:10.1039/d6ra01393g), 2026-05-06
Supplement: d6ra01393g1.pdf [file d6ra01393g1.pdf]

## Supplementary material

**Table S.1** Box-Behnken Design experience matrix.

|                | <b>Factor 1</b>          | <b>Factor 2</b> | <b>Factor 3</b>        | <b>Response 1</b>          |         |
|----------------|--------------------------|-----------------|------------------------|----------------------------|---------|
| <b>Std Run</b> | <b>A : Concentration</b> | <b>B : pH</b>   | <b>C : Temperature</b> | <b>Adsorption capacity</b> |         |
|                | (mg/L)                   |                 | (°C)                   | (mg/g)                     |         |
| 10             | 1                        | 80              | 10                     | 30                         | 96.584  |
| 17             | 2                        | 80              | 6                      | 40                         | 60.5    |
| 11             | 3                        | 80              | 2                      | 50                         | 34.695  |
| 4              | 4                        | 150             | 10                     | 40                         | 122.978 |
| 9              | 5                        | 80              | 2                      | 30                         | 46.51   |
| 3              | 6                        | 10              | 10                     | 40                         | 7.277   |
| 15             | 7                        | 80              | 6                      | 40                         | 60.5    |
| 1              | 8                        | 10              | 2                      | 40                         | 3.08    |
| 6              | 9                        | 150             | 6                      | 30                         | 106.39  |
| 2              | 10                       | 150             | 2                      | 40                         | 67.155  |
| 12             | 11                       | 80              | 10                     | 50                         | 67.45   |
| 5              | 12                       | 10              | 6                      | 30                         | 7.531   |
| 7              | 13                       | 10              | 6                      | 50                         | 6.117   |
| 13             | 14                       | 80              | 6                      | 40                         | 60.5    |
| 8              | 15                       | 150             | 6                      | 50                         | 99.3    |
| 16             | 16                       | 80              | 6                      | 40                         | 60.5    |
| 14             | 17                       | 80              | 6                      | 40                         | 60.5    |

**Table S2.** Experimental ranges and levels of input variables used in BBD model.

| <b>Variables</b>             | <b>Symbol</b> | <b>Low (-1)</b> | <b>medium (0)</b> | <b>High (1)</b> |
|------------------------------|---------------|-----------------|-------------------|-----------------|
| Initial concentration (mg/L) | A             | 10              | 80                | 150             |
| Initial pH                   | B             | 2               | 6                 | 10              |
| Temperature (°C)             | C             | 30              | 40                | 50              |

**Table S3.** Kinetic parameters and regression coefficients for the adsorption of MB onto SSW/FeCl<sub>2</sub>-FeCl<sub>3</sub> at 25°C.

| <b>Models</b>                          | <b>Parameters</b>                    | <b>Values</b>             |
|----------------------------------------|--------------------------------------|---------------------------|
| <b>PFO model (Non-linear form)</b>     | $q_{e,exp}$ (mg/g)                   | 81.47                     |
|                                        | $q_{e,calc}$ (mg/g)                  | $75.78 \pm 2.53$          |
|                                        | $k_1$ (min <sup>-1</sup> )           | $2.07 \pm 0.696$          |
|                                        | $R^2$                                | 0.9478                    |
| <b>PSO model (Non-linear form)</b>     | $q_{e,calc}$ (mg/g)                  | $77.38 \pm 2.49$          |
|                                        | $k_2$ (g/mg.min)                     | $0.059 \pm 0.033$         |
|                                        | $R^2$                                | 0.9604                    |
| <b>IPD model (Non-linear form)</b>     | $K_{id}$ (mg/g.min <sup>1/2</sup> )  | $5.60 \pm 2.49$           |
|                                        | $C$ (mg/g)                           | $42.04 \pm 12.81$         |
|                                        | $R^2$                                | 0.3655                    |
| <b>IPD model (Linear form)</b>         | $K_{id1}$ (mg/g.min <sup>1/2</sup> ) | $11.37 \pm 4.91$          |
|                                        | $C$ (mg/g)                           | $29.81 \pm 15.65$         |
|                                        | $R^2$                                | 0.4662                    |
|                                        | $K_{id2}$ (mg/g.min <sup>1/2</sup> ) | $0.548 \pm 0.288$         |
|                                        | $C$ (mg/g)                           | $76.65 \pm 2.23$          |
|                                        | $R^2$                                | 0.5671                    |
| <b>Elovich model (Non-linear form)</b> | $\alpha$ (mg/g.min)                  | $2.65.10^7 \pm 1.05.10^8$ |
|                                        | $\beta$ (g/mg)                       | $0.246 \pm 0.056$         |
|                                        | $R^2$                                | 0.9835                    |

**Table S4.** Isotherm parameters and regression coefficients for the adsorption of MB onto SSW/FeCl<sub>2</sub>-FeCl<sub>3</sub>.

| <b>Models</b>                            | <b>Parameters</b>                             | <b>values</b>      |
|------------------------------------------|-----------------------------------------------|--------------------|
| <b>Langmuir model (Non-linear form)</b>  | $q_m$ (mg/g)                                  | $114.47 \pm 13.38$ |
|                                          | $K_L$ (L/mg)                                  | $0.092 \pm 0.027$  |
|                                          | $R_L$                                         | 0.098-0.521        |
|                                          | $R^2$                                         | 0.9344             |
| <b>Freundlich model(Non-linear form)</b> | $K_F$ (mg/g)(L/mg) <sup>1/n</sup>             | $18.93 \pm 5.61$   |
|                                          | n                                             | $2.41 \pm 0.533$   |
|                                          | 1/n                                           | 0.415              |
|                                          | $R^2$                                         | 0.8362             |
| <b>Temkin model (Non-linear form)</b>    | $B_T$ (J/mol)                                 | $27.37 \pm 3.16$   |
|                                          | $K_T$ (L/mg)                                  | $0.709 \pm 0.173$  |
|                                          | $R^2$                                         | 0.9381             |
| <b>D-R model (Linear form)</b>           | $q_{mDR}$ (mg/g)                              | 81.45              |
|                                          | $K_{DR}$ (mol <sup>2</sup> /kJ <sup>2</sup> ) | $3.62 \pm 0.163$   |
|                                          | E (kJ/mol)                                    | 0.372              |
|                                          | $R^2$                                         | 0.9879             |
